# Supplementary material
Source: PubMed Central journal article supplement (PMC10564584)
Supplement: NIHMS1928840-supplement-Supplementary_Figure_1.pdf [file NIHMS1928840-supplement-Supplementary_Figure_1.pdf]

**Supplementary information**

---

**Co-opting signalling molecules enables  
logic-gated control of CAR T cells**

---

In the format provided by the  
authors and unedited

## Supplementary Figure 1 – Gating strategies for flow cytometric data

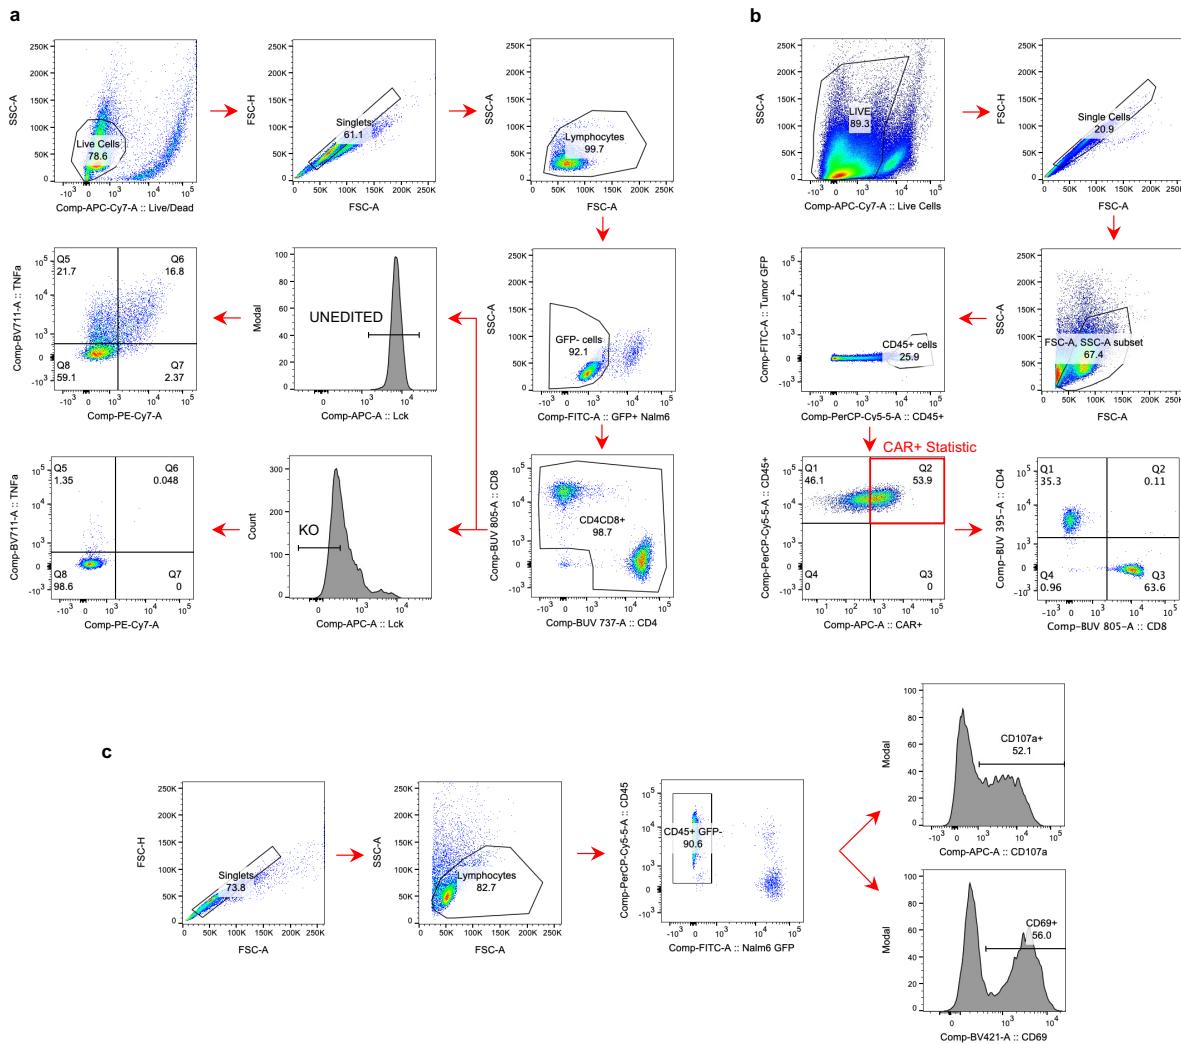

**a**, Intracellular cytokine staining of CRISPR/Cas9-edited CAR T Cells (Figures 1c-e, 3h-i, 4h-i; Extended Data Figures 1c, e-h, 5e-f, 6i-j).

**b**, Detection of CAR<sup>+</sup> T cells isolated from murine spleen and bone marrow tissue (Figure 3e; Extended Data Figure 2e-f, 8i).

**c**, LINK CAR T cell activation assays measuring CD107a and CD69 (Figure 5d; Extended Data Figure 7c).

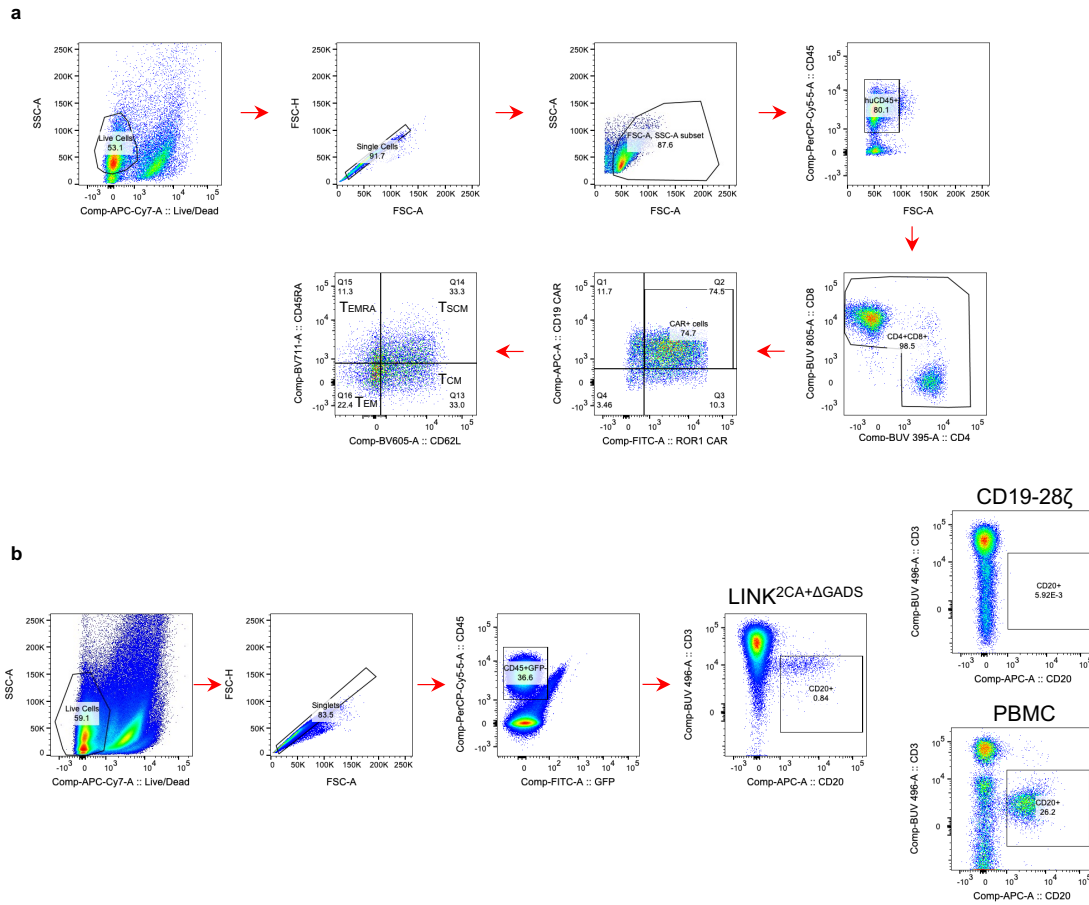

**a**, Detection of CAR<sup>+</sup> memory T cells isolated from murine spleen tissue (Extended Data Figure 8j-k).

**b**, Detection of CD20<sup>+</sup> human B cells isolated from murine spleen tissue (Extended Data Figure 9e-h).

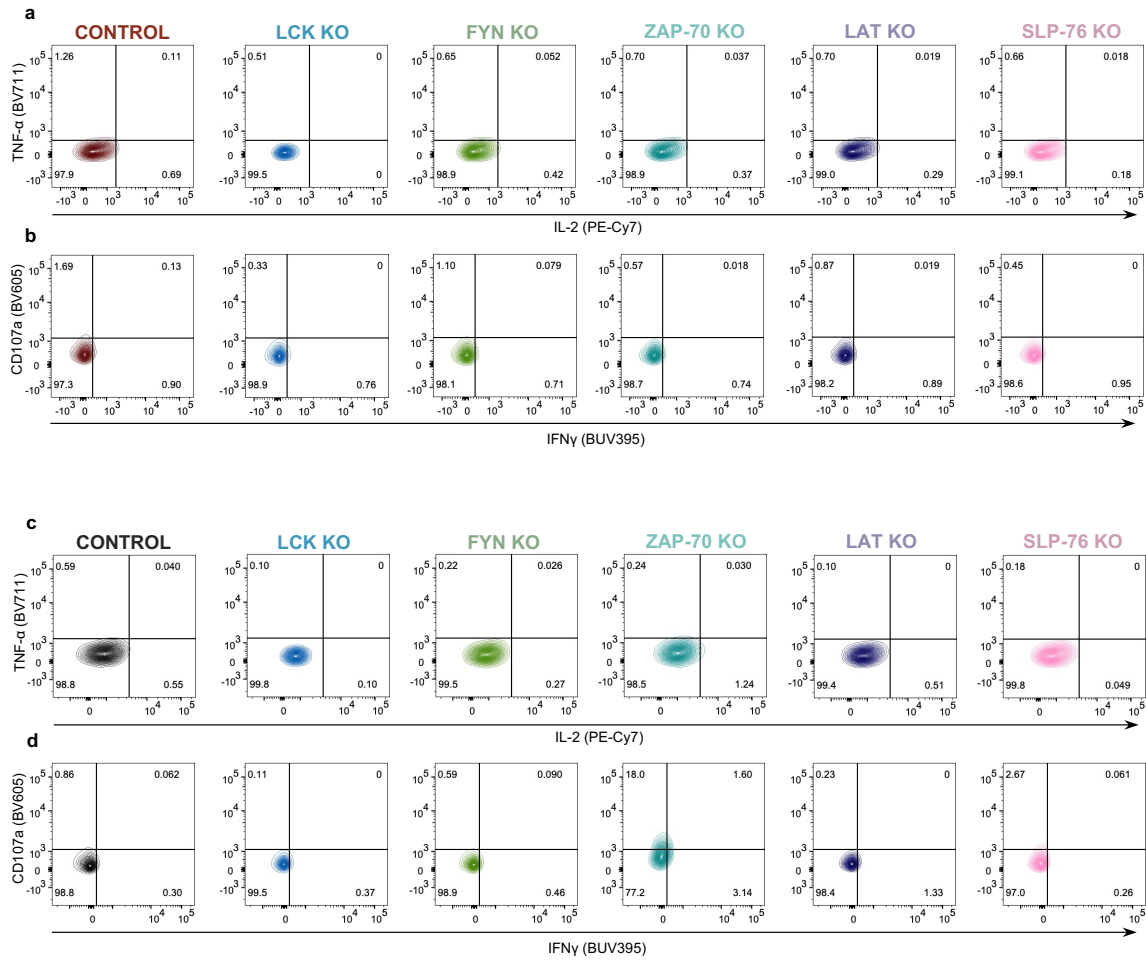

**a-b**, Flow cytometric plots of TNF- $\alpha$  x IL-2 (**a**) and CD107a x IFN $\gamma$  (**b**) in unstimulated unedited and edited CD19-4-1BB $\zeta$  CAR T cells. (Figure 1c-e; Extended Data Figure 1c)

**c-d**, Flow cytometric plots of TNF- $\alpha$  x IL-2 (**c**) and CD107a x IFN $\gamma$  (**d**) in unstimulated unedited and edited CD19-28 $\zeta$  CAR T cells. (Extended Data Figures 1e-h)

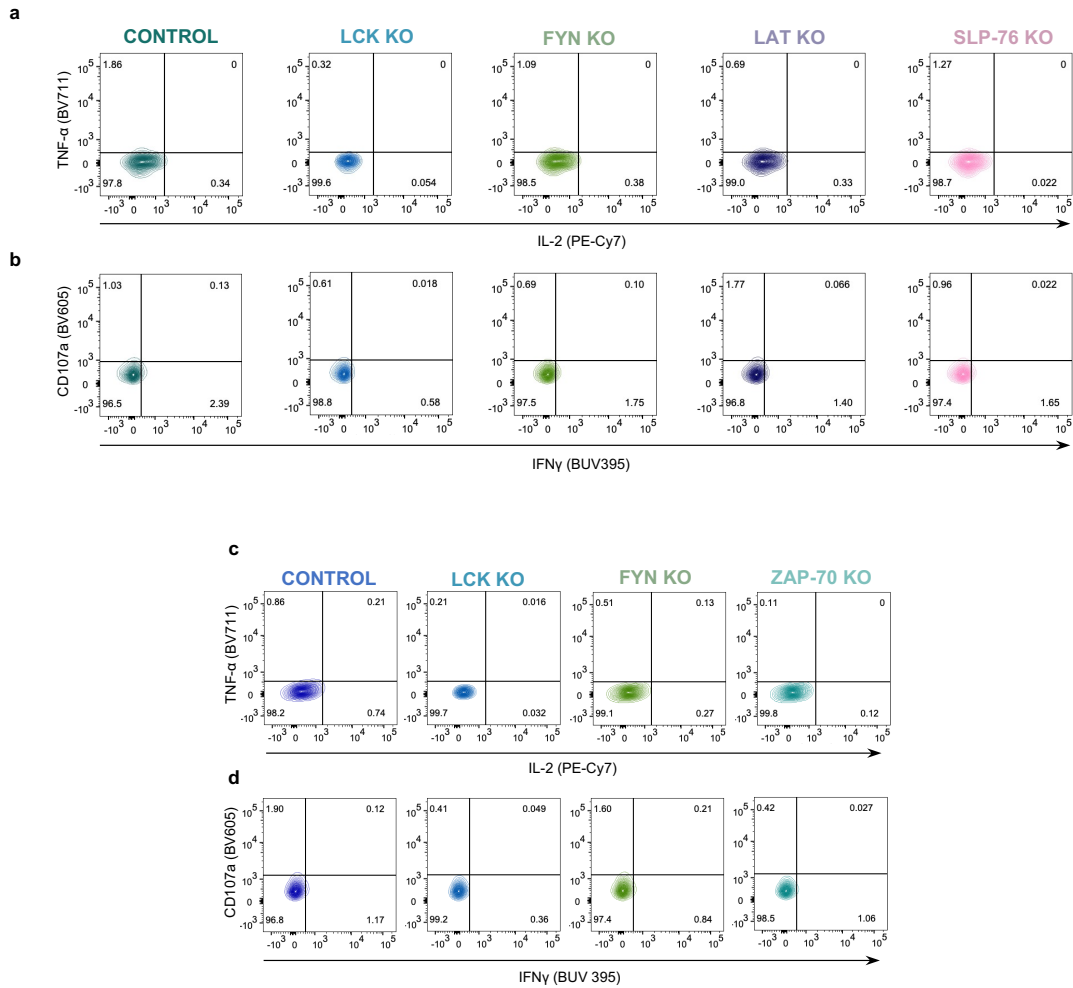

**a-b**, Flow cytometric plots of TNF- $\alpha$  x IL-2 (**a**) and CD107a x IFN $\gamma$  (**b**) in unstimulated unedited and edited B7-H3-ZAP-70<sup>KIDB</sup> CAR T cells. (Figure 3h-i; Extended Data Figure 5e-f)  
**c-d**, Flow cytometric plots of TNF- $\alpha$  x IL-2 (**c**) and CD107a x IFN $\gamma$  (**d**) in unstimulated unedited and edited LINK CAR T cells. (Figure 4h-i; Extended Data Figure 6i-j)
