# Supplementary material
Source: PubMed Central journal article supplement (PMC10564584)
Supplement: NIHMS1928840-supplement-Supplementary_Table_1.pdf [file NIHMS1928840-supplement-Supplementary_Table_1.pdf]

| scFvs (with 5' leader sequence and linker between VH and VL chains) |                                                                                                                                                                                                                                                                                                                 |
|---------------------------------------------------------------------|-----------------------------------------------------------------------------------------------------------------------------------------------------------------------------------------------------------------------------------------------------------------------------------------------------------------|
| CD19<br>(FMC63.3)                                                   | MLLLVTSLLLCELPHPAFLIPDIQMTQTSSLSASLGDRVTISCRAS<br>QDISKYLNWYQQKPDGTVKLLIYHTSRLHSGVPSRFSGSGSGTDYS<br>LTISNLEQEDIATYFCQQGNTLPYTFGGGTKLEITGSTSGSGKPGSG<br>EGSTKGEVKLQESGPGLVAPSQSLSVTCTVSGVSLPDYGVSWIRQP<br>PRKGLEWLGVIWGSETTYNSALKSRLTIKDNSKSQVFLKMNSLQ<br>TDDTAIYYCAKHYYYGGSYAMDYWGQGTSVTVSS                     |
| CD19<br>(FMC63.3) with<br>2xHA Tag                                  | MLLLVTSLLLCELPHPAFLIPYDPDYAYPYDVPDYADIQMTQ<br>TTSSLSASLGDRVTISCRASQDISKYLNWYQQKPDGTVKLLIYHTSR<br>LHSGVPSRFSGSGSGTDYSLTISNLEQEDIATYFCQQGNTLPYTFGG<br>GTKLEITGSTSGSGKPGSGEGSTKGEVKLQESGPGLVAPSQSLSVTC<br>TVSGVSLPDYGVSWIRQPPRKGLEWLGVIWGSETTYNSALKSRL<br>TIKDNSKSQVFLKMNSLQTDDTAIYYCAKHYYYGGSYAMDYWG<br>QGTSVTVSS |
| CD19<br>(FMC63.3) with<br>VSV-g Tag                                 | MARSVTLVFLVSLTGLYAAAYTDIEMNRLGKDIQMTQTSSLSAS<br>LGDRVTISCRASQDISKYLNWYQQKPDGTVKLLIYHTSRLHSGVPS<br>RFSGSGSGTDYSLTISNLEQEDIATYFCQQGNTLPYTFGGGTKLEIT<br>GSTSGSGKPGSGEGSTKGEVKLQESGPGLVAPSQSLSVTCTVSGVS<br>LPDYGVSWIRQPPRKGLEWLGVIWGSETTYNSALKSRLTIKDNS<br>KSQVFLKMNSLQTDDTAIYYCAKHYYYGGSYAMDYWGQGTSVT<br>VSS       |
| HER2 (4D5)                                                          | MARSVTLVFLVSLTGLYAAADIQMTQSPSSLSASVGDRTITCRA<br>SQDVNTAVAWYQQKPGKAPKLLIYSASFLESGVPSRFSGSRSGTDF<br>TLTISSLQPEDFATYYCQQHYTTPPTFGQGTKVEIKGSTSGSGKPGS<br>GEGSGEVQLVESGGGLVQPGGSLRLSCAASGFNIKDTYIHWVRQA<br>PGKGLEWVARIYPTNGYTRYADSVKGRFTISADTSKNTAYLQMNS<br>LRAEDTAVYYCSRWGGDGFYAMDVWGQGLTVTVSS                      |
| B7-H3<br>(MGA271)                                                   | MVATLLVTSLLLCELPHPAFLIPDTEVQLVESGGGLVQPGGSLRLS<br>CAASGFTFSSFGMHVVRQAPGKGLEWVAYISSDSSAIYYADTVKG<br>RFTISRDNKNSLYLQMNSLRDEDTAVYYCGRGRENIIYYGSRDY<br>WGQGTTVTVSSGGGGSGGGGSGGGGSDIQLTQSPSFLSASVGDRT<br>TITCKASQNVDTNVAWYQQKPGKAPKALISASRYSGVPSRFSG<br>SGSGTDFTLTISSLQPEDFATYYCQQYNNYPFTFGQGTKLEIK                  |
| GD2 (1A7)                                                           | MLLLVTSLLLCELPHPAFLIPDILLTQTPLSLPVSLGDQASISCRSSQ<br>SLVHRNGNTYLHWYLQKPGQSPKLLIHKVSNRFSGVPDRFSGSGS<br>GTDFTLKISRVEAEDLGVYFCSQSTHVPPLTFGAGTKLELKGSTSGS<br>GKPGSGEGSTKGEVKLQQSGPSLVEPGASVMISCKASGSSFTGYNM<br>NWVRQNIGKSLEWIGAIDPYYGGTSYNQKFKGRATLTVDKSSSTA<br>YMHLKSLTSEDSAVYYCVSGMEYWGQGTSVTVSS                   |
| ROR1<br>(humanized F)<br>with VSV-g Tag                             | MARSVTLVFLVSLTGLYAAAYTDIEMNRLGKDTQVQLVESGGG<br>WQPGRSLRLSCAASGFIFSEHNMAWVRQAPGKGLEWVATISDDGR<br>NTYYRDSMRGRFTISRDNKNTLYLQMNSLRAEDTAVYYCTSHRY<br>NLFDSWGQGTMTVTVSSGGGGSGGGGSGGGGSDIQMTQSPSSLSAS<br>VGDRTITCKASQNIIDRYLNWYQQKPGKAPKRLIYNTNKLQTVGP<br>SRFSGSGSGTEFTLTISSLQPEDFATYYCLQYNSLPLTFGQGTKLEIK             |

| <b>Hinge-Transmembrane Domains</b>                     |                                                                                                                                                                                                                                                                                                                                                                                                                                                                                                                                                                                                                  |
|--------------------------------------------------------|------------------------------------------------------------------------------------------------------------------------------------------------------------------------------------------------------------------------------------------------------------------------------------------------------------------------------------------------------------------------------------------------------------------------------------------------------------------------------------------------------------------------------------------------------------------------------------------------------------------|
| CD28 H/TM                                              | AAAIEVMYPPPYLDNEKSNGTIIHVKGKHLCPSPFPGPSKPFWVLV<br>VVGGVLACYSLLVTVAFIIFWV                                                                                                                                                                                                                                                                                                                                                                                                                                                                                                                                         |
| CD28 H/TM 2<br>Cysteine-<br>>Alanine<br>mutation (2CA) | AAAIEVMYPPPYLDNEKSNGTIIHVKGKHLAPSPFPGPSKPFWVL<br>VVVGGVLAAYSLLVTVAFIIFWV                                                                                                                                                                                                                                                                                                                                                                                                                                                                                                                                         |
| CD8 H/TM                                               | AAATTPAPRPPTPAPTASQPLSLRPEACRPAAGGAVHTRGLDFAC<br>DIYIWAPLAGTCGVLLLSLVITLYCK                                                                                                                                                                                                                                                                                                                                                                                                                                                                                                                                      |
| <b>Costimulatory Domains</b>                           |                                                                                                                                                                                                                                                                                                                                                                                                                                                                                                                                                                                                                  |
| CD28                                                   | RSKRSRLLHSDYMNMTPRRPGPTRKHYPYAPPRDFAAYRS                                                                                                                                                                                                                                                                                                                                                                                                                                                                                                                                                                         |
| 4-1BB                                                  | KRGRKLLYIFKQPFMRPVQTTQEEDGCSCRFPEEEEGGCEL                                                                                                                                                                                                                                                                                                                                                                                                                                                                                                                                                                        |
| <b>Signaling Domains</b>                               |                                                                                                                                                                                                                                                                                                                                                                                                                                                                                                                                                                                                                  |
| CD3 $\zeta$                                            | RVKFSRSADAPAYKQGQNQLYNELNLGRREEYDVLDKRRGRDPE<br>MGGKPRRKNPQEGLYNELQKDKMAEAYSEIGMKGERRRGKGH<br>GLYQGLSTATKDTYDALHMQALPPR                                                                                                                                                                                                                                                                                                                                                                                                                                                                                          |
| CD3 $\zeta$ (1XX)                                      | RVKFSRSADAPAYKQGQNQLYNELNLGRREEYDVLDKRRGRDPE<br>MGGKPRRKNPQEGLFNELQKDKMAEAFSEIGMKGERRRGKGH<br>DLFQGLSTATKDTFDALHMQALPPR                                                                                                                                                                                                                                                                                                                                                                                                                                                                                          |
| Lck                                                    | GSGGGGSGCGCSSHPEDDWMENIDVCENCHYPIVPLDGKGTLLIR<br>NGSEVRDPLVTYEGSNPPASPLQDNLVIALHSYEP SHDGD LGFEKG<br>EQLRILEQSGEWWKAQSLTTGQEGFIPNFVAKANSLEPEPWFFKN<br>LSRKDAERQLLAPGNTHGSFLIRESESTAGSFSLSVRDFDQNQGEV<br>VKHYKIRNLDNGGFYISPRITFPGLHELVRHYTNASDGLCTRLSRPC<br>QTQKPQKPWWEDWEVPRETLKLVERLGAGQFGEVWMGYYNH<br>TKVAVKSLKQGSMPDAFLAEANLMKQLQHQRVRLYAVVTQEP<br>IYIITEYMENGLVDFLKTPSGIKLTINKLLDMAAQIAEGMAFIEERN<br>YIHRDLRAANILVSDTLCKIADFLARLIEDNEYTAREGAKFPIKW<br>TAPEAINYGFTTIKSDVWSFGILLTEIVTHGRIPYPGMTNPEVIQNL<br>RGYRMVRPDNCPEELYQLMRLCWKERPEDRPTFDYLRVLEDDFT<br>ATEGQYQPQP                                          |
| Fyn                                                    | GSGGGGSGCVQCKDKEATKLTEERDGS LNQSSGYRYGTDPTPQHY<br>PSFGVTSIPNYNNFHAAGGQGLTVFGGVNSSSHTGTLRTRGGTGVT<br>LFVALYDYEARTEDDL SFHKGEKFQILNSSEG DWWEARSLTTGET<br>GYIPSNYVAPVDSIQAEWYFGKLGRKDAERQLLSFGNPRGTFILIR<br>ESETTKGAYSLSIRDWDDMKGDHVKHYKIRKLDNGGYIITRAQF<br>ETLQQLVQHYSERAAGLCCRLVVPCHKGMPRLTDLSVKTKDVWEI<br>PRESLQLIKRLGNGQFGEVWMGTWNGNTKVAIKTLKPGTMSPEF<br>LEEAQIMKKLKHDKLVQLYAVVSEEPYIVTEYMNKGSLLDFLKD<br>GEGRALKLPNLVDMAAQVAAGMAYIERMNYIHRDLRSANILVGN<br>GLICKIADFLARLIEDNEYTARQGAKFPIKWTAPEAALYGRFTIKS<br>DVWSFGILLTELVTKGRVPYPGMNNREVLEQVERGYRMPCPQDCP<br>ISLHELMIHCWKKDPEERPTFEYLQSFLEDYFTATEPQYQPGENL<br>NS |

|                                |                                                                                                                                                                                                                                                                                                                                                                                                                                                                                                                                                                                                                                                                                                                                                                                                                                                                                                                                                                                                                                                                                                                                                                                                                                                                                                                                                                                                                                                                                                                              |
|--------------------------------|------------------------------------------------------------------------------------------------------------------------------------------------------------------------------------------------------------------------------------------------------------------------------------------------------------------------------------------------------------------------------------------------------------------------------------------------------------------------------------------------------------------------------------------------------------------------------------------------------------------------------------------------------------------------------------------------------------------------------------------------------------------------------------------------------------------------------------------------------------------------------------------------------------------------------------------------------------------------------------------------------------------------------------------------------------------------------------------------------------------------------------------------------------------------------------------------------------------------------------------------------------------------------------------------------------------------------------------------------------------------------------------------------------------------------------------------------------------------------------------------------------------------------|
| <p>PLC<math>\gamma</math>1</p> | <p>GGGGSAGAASPCANGCGPGAPSDAEVLHLCRSLEVGTVMTLFYSK<br/> KSQRPERKTFQVKLETRQITWSRGADKIEGAIDIREIKEIRPGKTSRD<br/> FDRYQEDPAFRPDQSHCFVILYGMFRLKTLSLQATSEDEVNMWIK<br/> GLTWLMEDTLQAPTPLQIERWLRKQFYSDRNREDRISAKDLKNM<br/> LSQVNYRVPNMRFLRERLTDLEQRSGDITYGQFAQLYRSLMYSQAQ<br/> KTMDLPFLEASTLRAGERPELCRVSLPEFQQFLLDYQGELWAVDR<br/> LQVQEFMLSFLRDPLREIEEPYFFLDEFVTFLFSKENS VVNSQLDAV<br/> CPDTMNNPLSHYWISSHNTYLTDGQFSSSESSLEAYARCLRMGCRC<br/> IELDCWDGPDGMPVIYHGHTLTTKIKFSDVLHTIKEHAFVASEYPVI<br/> LSIEDHCSIAQQRNMAQYFKKVLGDTLLTKPVEISADGLPSPNQLK<br/> RKILIKHKKLAEGSAYEEVPTSMMYSENDISNSIKNGILYLEDPVNH<br/> EWYPHYFVLTSSKIYYSEETSSDQGNEDDEEPEVSSSTELHSNEK<br/> WFHGKLGAGRDRHIAERLLTEYCIETGAPDGSFLVRESETFVGDY<br/> TLFWRNGKVQHCRHSRQDAGTPKFFLTDNLVFDSDLYDLITHYQQ<br/> VPLRCNEFEMRLSEVPQTNAHESKEWYHASLTRAQAEHMLMRV<br/> PRDGAFLVRKRNEPNSY AISFRAEGKIKHCRVQQEGQTVMLGNSEF<br/> DSLVDLISYYEKHPLYRKMKLRYPINEEALEKIGTAEPDYGALYEG<br/> RNPFGFYVEANPMPTFKCAVKALFDYKAQREDELTFIKSAIIQNVEK<br/> QEGGWWRGDYGGKKQLWFPSNYVEEMVNPVALEPEREHL DENS<br/> PLGDLLRGVLDVPACQIAIRPEGKNNRLFVFSISMASVAHWSLDVA<br/> ADSQEELQDWVKKIREVAQTADARLTEGKIMERRKKIALELSELV<br/> VYCRPVPFDEEKIGTERACYRDMSSFPETKAEKYVNKAKGKKFLQ<br/> YNRLQLSRIYPKGQRLDSSNYDPLPMWICGSQLVALNFQTPDKPM<br/> QMNQALFMTGRHCGYVLQPSTMRDEAFDPFDKSSRLGLEPCAISIE<br/> VLGARHLPKNGRGIVCPFVEIEVAGAEYDSTKQKTEFVVDNGLNP<br/> VWPAKPFHFQISNPEFAFLRFVVEEDMFSDQNFLAQAATFPVKGLK<br/> TGYRAVPLKNNYSEDLELASLLIKIDIFPAKENGDLSPFSGTSLRER<br/> GSDASGQLFHGRAREGSFESRYQQPFEDFRISQEHLADHFDSRERR<br/> APRRTRVNGDNRL</p> |
| <p>ZAP-70</p>                  | <p>GSPDPA AHL PFFYGSISRAEAEHLKLAGMADGLFLLRQCLRSLGG<br/> YVLSLVHDVRFHHFPIERQLNGTYAIAGGKAHCGPAELCEFYSRDP<br/> DGLPCNLRKPCNRPSGLEPQPGVFDCLRDAMVRDYVRQTWKLEG<br/> EALEQAIISQAPQVEKLIATTAHERMPWYHSSLTREEAERKLYSGA<br/> QTDGKFLLRPRKEQGTYALS LIYGKTVYHYLISQDKAGKYCIPEGT<br/> KFDTLWQLVEYLK LKADGLIYCLKEACPNSSASNASGAAAPTLP<br/> HPSTLTHPQRRIDTLNSDGYTPEPARITSPDKPRPMPMDTSVYESPY<br/> SDPEELKDKKLF LKRDNLLIADIELGCGNFGSVRQGVYRMRKKQID<br/> VAIKVLKQGTEKADTEEMMREAQIMHQLDNPYIVRLIGVCQAEAL<br/> MLVMEMAGGGPLHKFLVGKREEIPVSNVAELLHQVSMGMKYLEE<br/> KNFVHRDLAARNVLLVNRHYAKISDFGLSKALGADDSYYTARSA<br/> GKWPLKWYAPECINFRKFSSRSVWSYGVTMWEALS YGQKPYKK<br/> MKGPEVMAFIEQGKRMECPPECPPELYALMSDCWIYKWEDRPDFL<br/> TVEQRM RACYYSLASKVEGPPGSTQKAEACAGNS</p>                                                                                                                                                                                                                                                                                                                                                                                                                                                                                                                                                                                                                                                                                                                                                                                      |

|                                       |                                                                                                                                                                                                                                                                                                                                                                                             |
|---------------------------------------|---------------------------------------------------------------------------------------------------------------------------------------------------------------------------------------------------------------------------------------------------------------------------------------------------------------------------------------------------------------------------------------------|
| ZAP-70 Kinase only                    | GSLIADIELGCGNFGSVRQGVYRMRKKQIDVAIKVLKQGTEKADT<br>EEMMREAQIMHQLDNPYIVRLIGVCQAEALMLVMEMAGGGPLHK<br>FLVGKREEIPVSNVAELLHQVSMGMKYLEEKNFVHRDLAARNVLL<br>VNRHYAKISDFGLSKALGADDSYYTARSAGKWPLKWYAPECINFR<br>KFSSRSVDVWSYGVTMWEALSYGQKPYKKMKGPEVMAFIEQGKR<br>MECPPECPPELYALMSDCWIYKWEDRPDFTVEQRMRACYYSLG<br>NS                                                                                        |
| ZAP-70 Interdomain B + Kinase (KIDB)  | GSPNSSASNASGAAAPTLPAHPSTLTHPQRRIDTLNSDGYTPEPARI<br>TSPDKPRPMPMDTSVYESPYSDPEELKDKKLFLKRDNLLIADIELGC<br>GNFGSVRQGVYRMRKKQIDVAIKVLKQGTEKADTEEMMREAQIM<br>HQLDNPYIVRLIGVCQAEALMLVMEMAGGGPLHKFLVGKREEIPV<br>SNVAELLHQVSMGMKYLEEKNFVHRDLAARNVLLVNRHYAKISD<br>FGLSKALGADDSYYTARSAGKWPLKWYAPECINFRKFSSRSVDVWS<br>YGVTMWEALSYGQKPYKKMKGPEVMAFIEQGKRMECPPECPPEL<br>YALMSDCWIYKWEDRPDFTVEQRMRACYYSLGNS |
| ZAP-70 KIDB D461N                     | GSPNSSASNASGAAAPTLPAHPSTLTHPQRRIDTLNSDGYTPEPARI<br>TSPDKPRPMPMDTSVYESPYSDPEELKDKKLFLKRDNLLIADIELGC<br>GNFGSVRQGVYRMRKKQIDVAIKVLKQGTEKADTEEMMREAQIM<br>HQLDNPYIVRLIGVCQAEALMLVMEMAGGGPLHKFLVGKREEIPV<br>SNVAELLHQVSMGMKYLEEKNFVHRNLAARNVLLVNRHYAKISD<br>FGLSKALGADDSYYTARSAGKWPLKWYAPECINFRKFSSRSVDVWS<br>YGVTMWEALSYGQKPYKKMKGPEVMAFIEQGKRMECPPECPPEL<br>YALMSDCWIYKWEDRPDFTVEQRMRACYYSLGNS |
| LAT                                   | GSHCHRLPGSYDSTSSDSLYPRGIQFKRPHTVAPWPPAYPPVTSYPP<br>LSQPDLLPIRSPQPLGGSHRTPSSRRSDSGANSVASYENEGASGIR<br>GAQAGWGWGPSWTRLTPVSLPPEPACEDADEDEDDYHNPGYLV<br>VLPDSTPATSTAAPSAPALSTPGIRDSAFSMESIDYVNVPEGESA<br>EASLDGSREYVNVSQELHPGAAKTEPAALSSQEAEEVEEEGAPDYE<br>NLQELNGNS                                                                                                                            |
| LAT Y132F                             | GSHCHRLPGSYDSTSSDSLYPRGIQFKRPHTVAPWPPAYPPVTSYPP<br>LSQPDLLPIRSPQPLGGSHRTPSSRRSDSGANSVASYENEGASGIR<br>GAQAGWGWGPSWTRLTPVSLPPEPACEDADEDEDDYHNPGFLV<br>VLPDSTPATSTAAPSAPALSTPGIRDSAFSMESIDYVNVPEGESA<br>EASLDGSREYVNVSQELHPGAAKTEPAALSSQEAEEVEEEGAPDYE<br>NLQELNGNS                                                                                                                            |
| LAT 171-233 deletion ( $\Delta$ GADS) | GSHCHRLPGSYDSTSSDSLYPRGIQFKRPHTVAPWPPAYPPVTSYPP<br>LSQPDLLPIRSPQPLGGSHRTPSSRRSDSGANSVASYENEGASGIR<br>GAQAGWGWGPSWTRLTPVSLPPEPACEDADEDEDDYHNPGYLV<br>VLPDSTPATSTAAPSAPALSTPGIRDSAFSMESIDD                                                                                                                                                                                                    |

|                                       |                                                                                                                                                                                                                                                                                                                                                                                                                                                                                                                                                                                                              |
|---------------------------------------|--------------------------------------------------------------------------------------------------------------------------------------------------------------------------------------------------------------------------------------------------------------------------------------------------------------------------------------------------------------------------------------------------------------------------------------------------------------------------------------------------------------------------------------------------------------------------------------------------------------|
| LAT Y171F<br>Y191F (2YF)              | GSHCHRLPGSYDSTSSDSLYPRGIQFKRPHTVAPWPPAYPPVTSYPP<br>LSQPDLLPIPRSPQPLGGSHRTPSSRRDSDGANSVASYENEGASGIR<br>GAQAGWGVWGPSWTRLTPVSLPPEPACEDADEDEDDYHNPGYLV<br>VLPDSTPATSTAAPSAPALSTPGIRDSAFSMESIDDFVNVPESGESAE<br>ASLDGSREFVNVSQELHPGAAKTEPAALSSQEAEVEVEEGAPDYEN<br>LQELNGNS                                                                                                                                                                                                                                                                                                                                         |
| SLP-76                                | GSGGGGSALRNVPRSEVLGWDPDSLADYFKKLNKYDCEKAVKK<br>YHIDGARFLNLTENDIQKFKLRVPILSKLSQEINKNEERRSIFTRKP<br>QVPRFPEETESHEEDNGGWSSFEEDDYESPNDQDGEDDGDYESP<br>NEEEEAPVEDDADYEPPPSNDEEALQNSILPAKPPFNSNSMYIDRPP<br>SGKTPQQPPVPPQRPMAALPPPAGRNHSPLPPPQTNHEEPSRSRNH<br>KTAKLPAPSIDRSTKPLDRSLAPFDREPFTLGKKPPFSDKPSIPAGR<br>SLGEHLPKIQKPPLPPTTERHERSSPLPGKPPVPKHGWGPDRREND<br>EDDVHQRLPQPALLPMSSNTFPSRSTKPSPMNPLPSSHMPGAFSES<br>NSSFPQSASLPPYFSQGSPNRPPIRAEGRNFLPLPNKPRPPSPAEEEN<br>SLNEEWYVSYITRPEAEAALRKINQDGTFLVRDSSKKTTPNYVLM<br>VLYKDKVYNIQIRYQKESQVYLLGTGLRGKEDFLSVSDIIDYFRKM<br>PLLLIDGKNRGSRYQCTLTHAAGYPGNS            |
| SLP-76 224-244<br>deletion<br>(ΔGADS) | GSGGGGSALRNVPRSEVLGWDPDSLADYFKKLNKYDCEKAVKK<br>YHIDGARFLNLTENDIQKFKLRVPILSKLSQEINKNEERRSIFTRKP<br>QVPRFPEETESHEEDNGGWSSFEEDDYESPNDQDGEDDGDYESP<br>NEEEEAPVEDDADYEPPPSNDEEALQNSILPAKPPFNSNSMYIDRPP<br>SGKTPQQPPVPPQRPMAALPPPAGRNHSPLPPPQTNHEEPSRSRRS<br>LAPFDREPFTLGKKPPFSDKPSIPAGRSLGEHLPKIQKPPLPPTTERH<br>ERSSPLPGKPPVPKHGWGPDRRENDEDDVHQRLPQPALLPMSS<br>NTFPSRSTKPSPMNPLPSSHMPGAFSESNSSFPQSASLPPYFSQGSPN<br>RPPIRAEGRNFLPLPNKPRPPSPAEEENSLNEEWYVSYITRPEAEA<br>LRKINQDGTFLVRDSSKKTTPNYVLMVLYKDKVYNIQIRYQKES<br>QVYLLGTGLRGKEDFLSVSDIIDYFRKMPLLLIDGKNRGSRYQCTL<br>THAAGYPGNS                                 |
| Notch+Gal4-<br>VP64                   | ILDYSFTGGAGRDIPPPQIEEACELPECQVDAGNKVCNLQCNNHAC<br>GWDGGDCSLNFNDPWKNCTQSLQCWKYFSDGHCDQGCNSAECWGLD<br>DGFDCQLTEGQCNPYDQYCKDHFSDGHCDQGCNSAECWGLD<br>CAEHVPERLAAGTLVLVLLPPDQLRNNSFHFLRELSHVLHTNVVF<br>KRDAQGQQMIFPYYGHEELRKHPIKRSTVGWATSSLLPGTSGGR<br>QRRELDPMDIRGSIVYLEIDNRQCVQSSSQCFQSATDVA AFLGALA<br>SLGSLNIPYKIEAVKSEPVEPPLPSQLHLMYVAAAFAVLLFFVGCV<br>LLSRKRRRMKLLSSIEQACDICRLKCLKSKEKPKCAKCLKNNWE<br>CRYSKTKRSPLTRAHLTEVESRLERLEQLFLIFPREDLDMILKMD<br>SLQDIKALLTGLFVQDNVNKDAVTDRLASVETDMPLTLRQHRISAT<br>SSSESSNKGQRQLTVSAAAGSGSGGSDALDDFDLDMLGSDAL<br>DDFDLDMLGSDALDDFDLDMLGSDALDDFDLDMLGSDALDDFDLDMLGSDAL |
