# Supplementary material
Source: PubMed Central journal article supplement (PMC10564584)

Supplementary Figure 2: Raw western blot data (corresponding to Extended Data Figure 4a/4b)

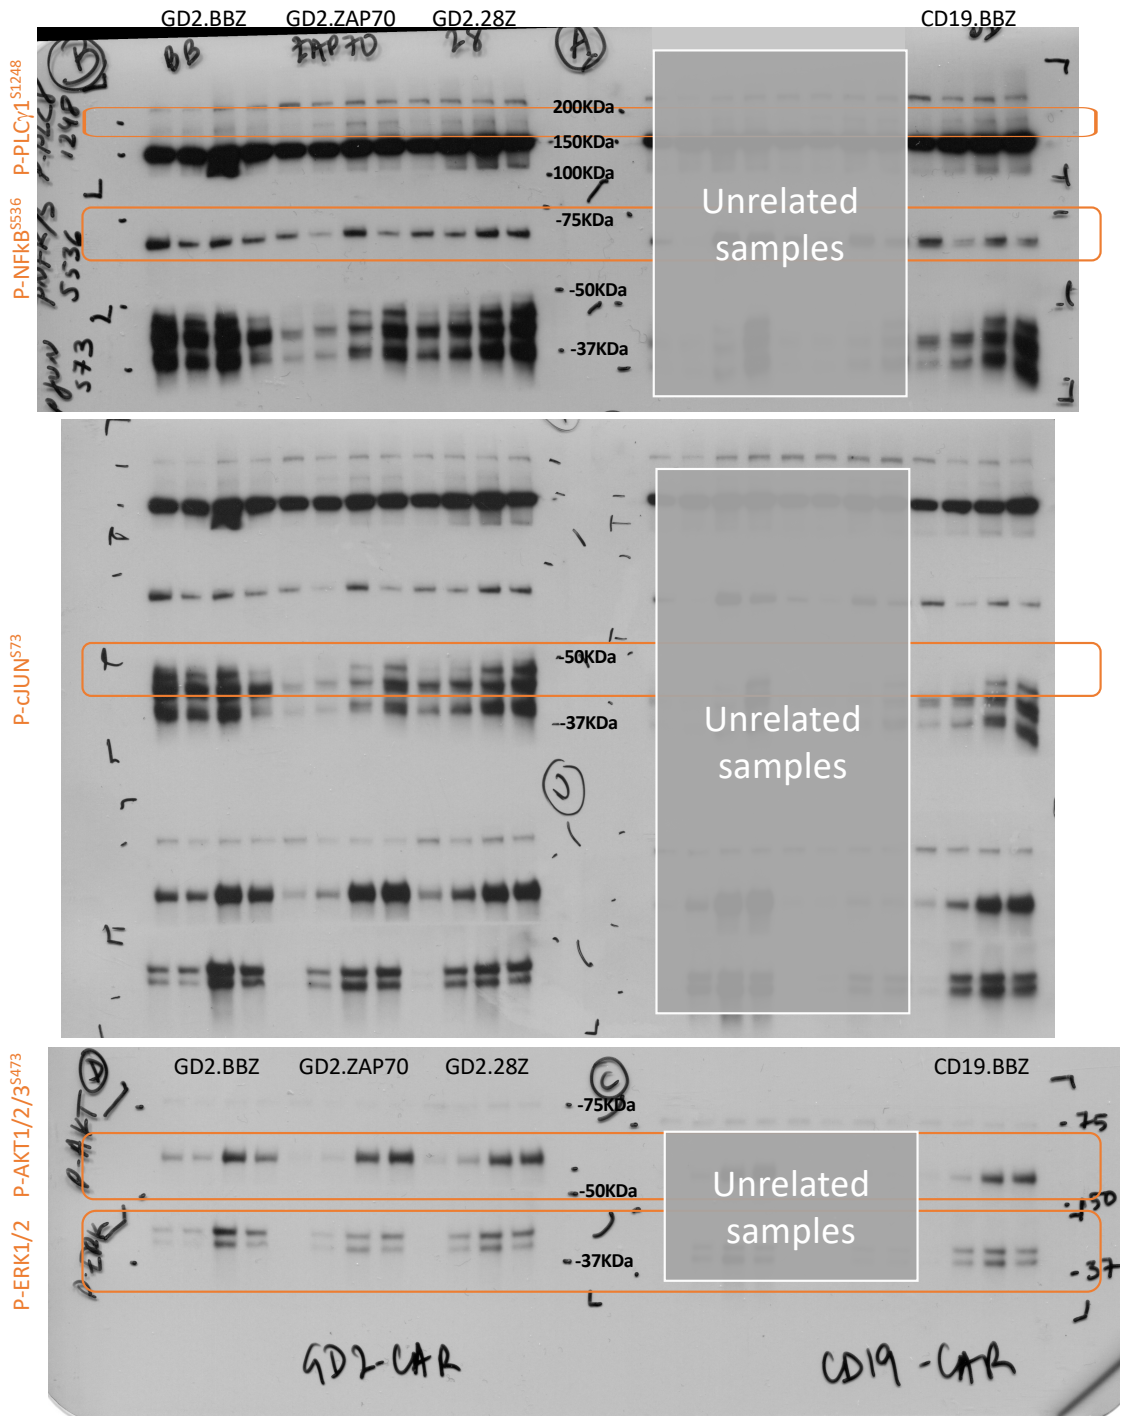

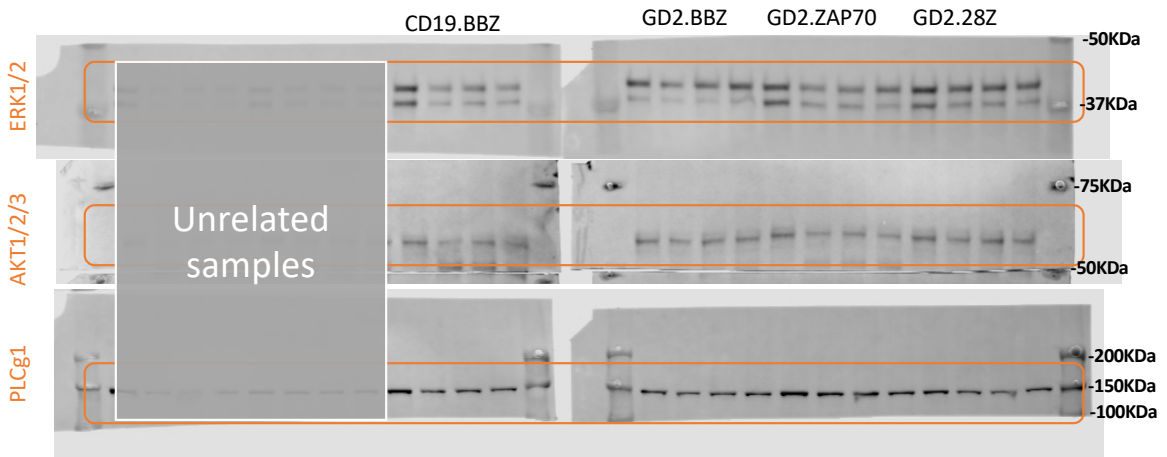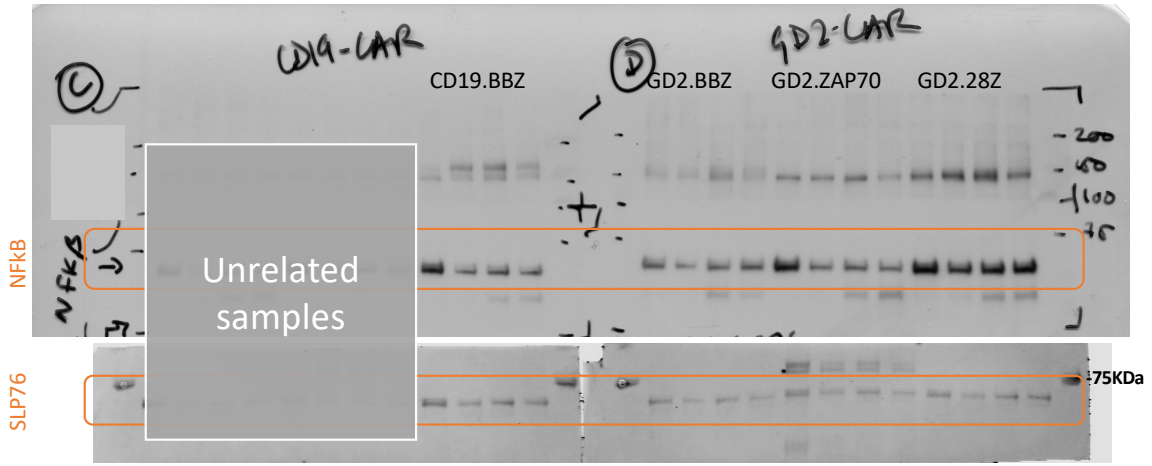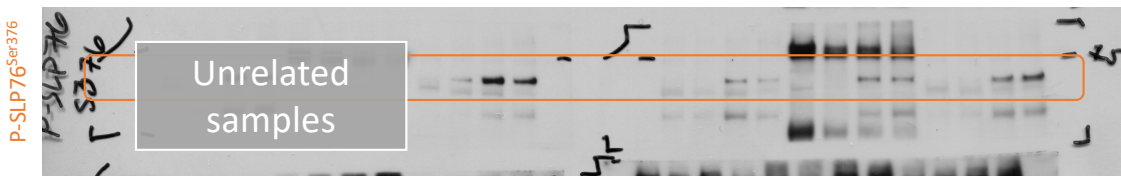

Supplement: NIHMS1928840-supplement-Supplementary_Figure_2.pdf [file NIHMS1928840-supplement-Supplementary_Figure_2.pdf]
